# Supplementary material for: Clinicopathological and Demographical Characteristics of Non-Small Cell Lung Cancer Patients with ALK Rearrangements: A Systematic Review and Meta-Analysis
Source: PubMed Central journal article supplement (PMC4069179; doi:10.1371/journal.pone.0100866), 2014-06-24

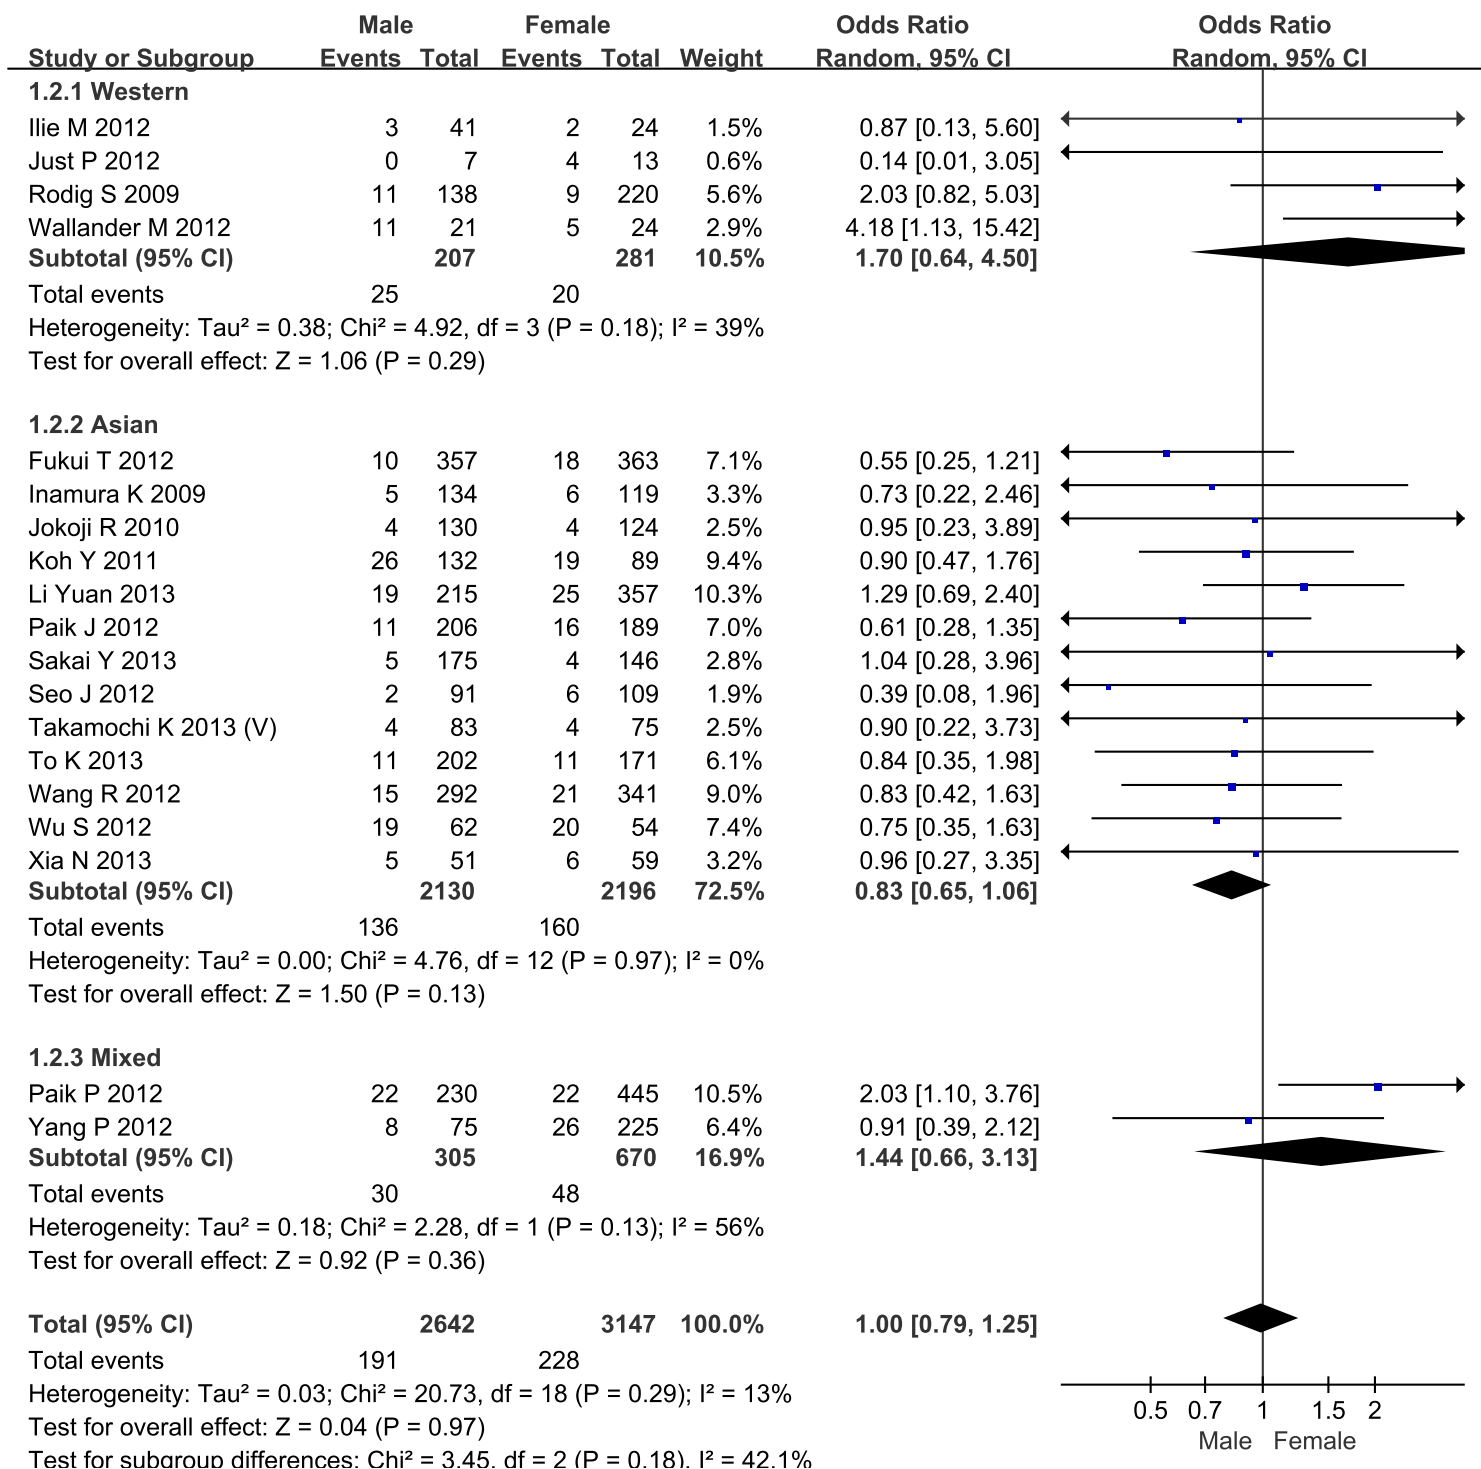

Supplement: pone.0100866.s003.pdf [file pone.0100866.s003.pdf]
